# Supplementary material for: Chromosomal Redistribution of Male-Biased Genes in Mammalian Evolution with Two Bursts of Gene Gain on the X Chromosome
Source: PLoS Biol. 2010 Oct 5;8(10):e1000494. doi: 10.1371/journal.pbio.1000494 (PMC2950125; doi:10.1371/journal.pbio.1000494)
Supplement: Table S2 — Mouse gene branch assignment together with expression bias annotation. Branch assignments follow Figure 1B. For genes without unique Affymetrix mouse 430 2.0 probes, the expression bias is shown as “NA.” (2.01 MB XLS) [file pbio.1000494.s010.xls]

## Sheet: S2
Table S2. Mouse gene assignment together with the expression bias annotation
gene	branch	chrom	bias
ENSMUSG00000054626	11	X	NA
ENSMUSG00000073069	11	X	NA
ENSMUSG00000079634	11	X	NA
ENSMUSG00000078331	11	X	NA
ENSMUSG00000078330	11	X	NA
ENSMUSG00000078329	11	X	NA
ENSMUSG00000078328	11	X	NA
ENSMUSG00000078326	11	X	NA
ENSMUSG00000078325	11	X	NA
ENSMUSG00000078324	11	X	NA
ENSMUSG00000078323	11	X	NA
ENSMUSG00000051537	11	X	unbiased
ENSMUSG00000054994	11	X	NA
ENSMUSG00000035371	11	X	NA
ENSMUSG00000080026	11	X	NA
ENSMUSG00000080028	11	X	NA
ENSMUSG00000044121	11	X	NA
ENSMUSG00000073068	11	X	NA
ENSMUSG00000078333	11	X	NA
ENSMUSG00000048155	11	X	male
ENSMUSG00000068103	11	X	NA
ENSMUSG00000068149	11	X	NA
ENSMUSG00000078346	11	X	NA
ENSMUSG00000051827	11	X	NA
ENSMUSG00000078343	11	X	NA
ENSMUSG00000078342	11	X	NA
ENSMUSG00000078341	11	X	NA
ENSMUSG00000068218	11	X	NA
ENSMUSG00000078340	11	X	NA
ENSMUSG00000078339	11	X	NA
ENSMUSG00000078338	11	X	NA
ENSMUSG00000078337	11	X	NA
ENSMUSG00000078336	11	X	NA
ENSMUSG00000078335	11	X	NA
ENSMUSG00000078334	11	X	NA
ENSMUSG00000079450	11	X	NA
ENSMUSG00000080046	11	X	NA
ENSMUSG00000080050	11	X	NA
ENSMUSG00000078208	11	X	NA
ENSMUSG00000079395	11	X	NA
ENSMUSG00000006200	11	X	unbiased
ENSMUSG00000055746	11	X	NA
ENSMUSG00000055816	11	X	NA
ENSMUSG00000073125	11	X	NA
ENSMUSG00000079374	11	X	NA
ENSMUSG00000048592	11	X	NA
ENSMUSG00000069038	11	X	NA
ENSMUSG00000048600	11	X	NA
ENSMUSG00000078120	11	X	NA
ENSMUSG00000059626	11	X	NA
ENSMUSG00000059539	11	X	NA
ENSMUSG00000063080	11	X	NA
ENSMUSG00000079349	11	X	male
ENSMUSG00000073173	11	X	NA
ENSMUSG00000078211	11	X	NA
ENSMUSG00000023165	11	X	NA
ENSMUSG00000078212	11	X	NA
ENSMUSG00000080051	11	X	NA
ENSMUSG00000078222	11	X	NA
ENSMUSG00000080054	11	X	NA
ENSMUSG00000080057	11	X	NA
ENSMUSG00000078221	11	X	NA
ENSMUSG00000078220	11	X	NA
ENSMUSG00000078219	11	X	NA
ENSMUSG00000078218	11	X	NA
ENSMUSG00000080071	11	X	NA
ENSMUSG00000080072	11	X	NA
ENSMUSG00000080073	11	X	NA
ENSMUSG00000078217	11	X	NA
ENSMUSG00000078216	11	X	NA
ENSMUSG00000078215	11	X	NA
ENSMUSG00000078214	11	X	NA
ENSMUSG00000078213	11	X	NA
ENSMUSG00000073247	11	X	NA
ENSMUSG00000079593	11	X	NA
ENSMUSG00000079653	11	X	NA
ENSMUSG00000079655	11	X	NA
ENSMUSG00000067208	11	X	NA
ENSMUSG00000067209	11	X	NA
ENSMUSG00000079697	11	X	NA
ENSMUSG00000067358	11	X	NA
ENSMUSG00000079701	11	X	NA
ENSMUSG00000079702	11	X	NA
ENSMUSG00000067359	11	X	NA
ENSMUSG00000061065	11	X	NA
ENSMUSG00000079703	11	X	NA
ENSMUSG00000079704	11	X	NA
ENSMUSG00000079705	11	X	NA
ENSMUSG00000067360	11	X	NA
ENSMUSG00000067402	11	X	NA
ENSMUSG00000047079	11	X	NA
ENSMUSG00000079650	11	X	NA
ENSMUSG00000079649	11	X	NA
ENSMUSG00000079647	11	X	NA
ENSMUSG00000079590	11	X	NA
ENSMUSG00000057402	11	X	NA
ENSMUSG00000079619	11	X	NA
ENSMUSG00000079629	11	X	NA
ENSMUSG00000079630	11	X	NA
ENSMUSG00000079631	11	X	NA
ENSMUSG00000079632	11	X	NA
ENSMUSG00000079633	11	X	NA
ENSMUSG00000079635	11	X	NA
ENSMUSG00000079636	11	X	NA
ENSMUSG00000079566	11	X	NA
ENSMUSG00000079637	11	X	NA
ENSMUSG00000079638	11	X	NA
ENSMUSG00000079639	11	X	NA
ENSMUSG00000061283	11	X	NA
ENSMUSG00000061227	11	X	NA
ENSMUSG00000067562	11	X	NA
ENSMUSG00000079534	11	X	NA
ENSMUSG00000071815	11	X	NA
ENSMUSG00000071788	11	X	NA
ENSMUSG00000071781	11	X	NA
ENSMUSG00000071770	11	X	NA
ENSMUSG00000072928	11	X	NA
ENSMUSG00000072929	11	X	NA
ENSMUSG00000067768	11	X	NA
ENSMUSG00000072930	11	X	NA
ENSMUSG00000072932	11	X	NA
ENSMUSG00000071762	11	X	NA
ENSMUSG00000071748	11	X	NA
ENSMUSG00000071726	11	X	NA
ENSMUSG00000071721	11	X	NA
ENSMUSG00000071701	11	X	NA
ENSMUSG00000067909	11	X	NA
ENSMUSG00000071700	11	X	NA
ENSMUSG00000067764	11	X	NA
ENSMUSG00000072925	11	X	NA
ENSMUSG00000079591	11	X	NA
ENSMUSG00000079532	11	X	NA
ENSMUSG00000079531	11	X	NA
ENSMUSG00000079843	11	X	NA
ENSMUSG00000067647	11	X	NA
ENSMUSG00000079851	11	X	NA
ENSMUSG00000079521	11	X	NA
ENSMUSG00000079519	11	X	NA
ENSMUSG00000072921	11	X	NA
ENSMUSG00000045694	11	X	NA
ENSMUSG00000067650	11	X	NA
ENSMUSG00000072249	11	X	NA
ENSMUSG00000072157	11	X	NA
ENSMUSG00000072922	11	X	NA
ENSMUSG00000072924	11	X	NA
ENSMUSG00000067684	11	X	unbiased
ENSMUSG00000072049	11	X	NA
ENSMUSG00000079475	11	X	NA
ENSMUSG00000073177	11	X	NA
ENSMUSG00000058147	11	X	NA
ENSMUSG00000063709	11	X	NA
ENSMUSG00000073267	11	X	NA
ENSMUSG00000080266	11	X	NA
ENSMUSG00000080301	11	X	NA
ENSMUSG00000058328	11	X	NA
ENSMUSG00000080300	11	X	NA
ENSMUSG00000040749	11	X	NA
ENSMUSG00000073263	11	X	NA
ENSMUSG00000080299	11	X	NA
ENSMUSG00000064334	11	X	NA
ENSMUSG00000080289	11	X	NA
ENSMUSG00000080290	11	X	NA
ENSMUSG00000059047	11	X	NA
ENSMUSG00000080291	11	X	NA
ENSMUSG00000073255	11	X	NA
ENSMUSG00000072100	11	X	NA
ENSMUSG00000063728	11	X	male
ENSMUSG00000073253	11	X	NA
ENSMUSG00000073245	11	X	NA
ENSMUSG00000080253	11	X	NA
ENSMUSG00000080245	11	X	NA
ENSMUSG00000080254	11	X	NA
ENSMUSG00000073257	11	X	NA
ENSMUSG00000063816	11	X	NA
ENSMUSG00000079558	11	9	NA
ENSMUSG00000074062	11	9	female
ENSMUSG00000074232	11	9	NA
ENSMUSG00000066626	11	9	NA
ENSMUSG00000074034	11	9	NA
ENSMUSG00000064299	11	9	NA
ENSMUSG00000070310	11	9	NA
ENSMUSG00000054087	11	9	NA
ENSMUSG00000053820	11	9	NA
ENSMUSG00000060905	11	9	NA
ENSMUSG00000074250	11	9	NA
ENSMUSG00000070324	11	9	female
ENSMUSG00000079257	11	9	NA
ENSMUSG00000061167	11	9	NA
ENSMUSG00000070289	11	9	NA
ENSMUSG00000079284	11	9	NA
ENSMUSG00000073229	11	9	NA
ENSMUSG00000062275	11	9	female
ENSMUSG00000049314	11	9	female
ENSMUSG00000078305	11	9	NA
ENSMUSG00000079427	11	9	NA
ENSMUSG00000066478	11	9	NA
ENSMUSG00000058838	11	9	NA
ENSMUSG00000062358	11	9	NA
ENSMUSG00000045159	11	9	unbiased
ENSMUSG00000074460	11	9	NA
ENSMUSG00000074516	11	9	NA
ENSMUSG00000064333	11	9	NA
ENSMUSG00000079895	11	9	NA
ENSMUSG00000057982	11	9	female
ENSMUSG00000066592	11	9	NA
ENSMUSG00000058777	11	9	NA
ENSMUSG00000074059	11	9	female
ENSMUSG00000062874	11	9	NA
ENSMUSG00000049708	11	9	NA
ENSMUSG00000066809	11	9	NA
ENSMUSG00000074123	11	9	NA
ENSMUSG00000059571	11	9	NA
ENSMUSG00000059658	11	9	NA
ENSMUSG00000042730	11	9	NA
ENSMUSG00000074148	11	9	NA
ENSMUSG00000056904	11	9	NA
ENSMUSG00000042360	11	9	male
ENSMUSG00000074149	11	9	NA
ENSMUSG00000048648	11	9	NA
ENSMUSG00000059547	11	9	NA
ENSMUSG00000074060	11	9	NA
ENSMUSG00000074061	11	9	female
ENSMUSG00000063842	11	9	NA
ENSMUSG00000079228	11	9	NA
ENSMUSG00000059252	11	9	NA
ENSMUSG00000074146	11	9	NA
ENSMUSG00000074147	11	9	NA
ENSMUSG00000062726	11	9	NA
ENSMUSG00000066771	11	9	NA
ENSMUSG00000074446	11	8	NA
ENSMUSG00000071138	11	8	male
ENSMUSG00000080067	11	8	NA
ENSMUSG00000037790	11	8	unbiased
ENSMUSG00000079052	11	8	NA
ENSMUSG00000074134	11	8	female
ENSMUSG00000080227	11	8	NA
ENSMUSG00000079041	11	8	NA
ENSMUSG00000071796	11	8	NA
ENSMUSG00000074302	11	8	NA
ENSMUSG00000054652	11	8	NA
ENSMUSG00000074046	11	8	NA
ENSMUSG00000071164	11	8	NA
ENSMUSG00000064064	11	8	NA
ENSMUSG00000074449	11	8	NA
ENSMUSG00000080066	11	8	NA
ENSMUSG00000080065	11	8	NA
ENSMUSG00000074442	11	8	NA
ENSMUSG00000060208	11	8	NA
ENSMUSG00000080047	11	8	NA
ENSMUSG00000065950	11	8	NA
ENSMUSG00000068631	11	8	NA
ENSMUSG00000074456	11	8	NA
ENSMUSG00000070058	11	8	NA
ENSMUSG00000070025	11	8	NA
ENSMUSG00000074441	11	8	NA
ENSMUSG00000045337	11	8	male
ENSMUSG00000080064	11	8	NA
ENSMUSG00000080062	11	8	NA
ENSMUSG00000080059	11	8	NA
ENSMUSG00000031471	11	8	unbiased
ENSMUSG00000074434	11	8	NA
ENSMUSG00000074439	11	8	NA
ENSMUSG00000074440	11	8	NA
ENSMUSG00000074444	11	8	NA
ENSMUSG00000074443	11	8	NA
ENSMUSG00000061845	11	8	NA
ENSMUSG00000079115	11	8	NA
ENSMUSG00000046282	11	8	NA
ENSMUSG00000052934	11	8	female
ENSMUSG00000048516	11	8	male
ENSMUSG00000039775	11	8	male
ENSMUSG00000079993	11	8	NA
ENSMUSG00000079016	11	8	NA
ENSMUSG00000078967	11	8	NA
ENSMUSG00000050756	11	8	unbiased
ENSMUSG00000075581	11	8	NA
ENSMUSG00000079996	11	8	NA
ENSMUSG00000065957	11	8	NA
ENSMUSG00000058906	11	8	NA
ENSMUSG00000071793	11	8	NA
ENSMUSG00000030735	11	8	NA
ENSMUSG00000048484	11	8	NA
ENSMUSG00000059333	11	8	NA
ENSMUSG00000057116	11	8	NA
ENSMUSG00000074383	11	8	NA
ENSMUSG00000079058	11	8	male
ENSMUSG00000050190	11	8	NA
ENSMUSG00000079116	11	8	NA
ENSMUSG00000074347	11	8	NA
ENSMUSG00000074381	11	8	NA
ENSMUSG00000071937	11	8	male
ENSMUSG00000062172	11	7	NA
ENSMUSG00000079924	11	7	NA
ENSMUSG00000078406	11	7	NA
ENSMUSG00000058631	11	7	unbiased
ENSMUSG00000074331	11	7	NA
ENSMUSG00000066516	11	7	male
ENSMUSG00000078404	11	7	NA
ENSMUSG00000046924	11	7	NA
ENSMUSG00000066814	11	7	NA
ENSMUSG00000078405	11	7	NA
ENSMUSG00000078380	11	7	NA
ENSMUSG00000066836	11	7	NA
ENSMUSG00000078407	11	7	NA
ENSMUSG00000078408	11	7	NA
ENSMUSG00000051687	11	7	NA
ENSMUSG00000078648	11	7	NA
ENSMUSG00000078397	11	7	NA
ENSMUSG00000035523	11	7	male
ENSMUSG00000078383	11	7	NA
ENSMUSG00000074333	11	7	NA
ENSMUSG00000074359	11	7	male
ENSMUSG00000078757	11	7	NA
ENSMUSG00000078756	11	7	NA
ENSMUSG00000074334	11	7	NA
ENSMUSG00000078754	11	7	NA
ENSMUSG00000073959	11	7	NA
ENSMUSG00000066828	11	7	NA
ENSMUSG00000060690	11	7	NA
ENSMUSG00000074323	11	7	NA
ENSMUSG00000078755	11	7	NA
ENSMUSG00000078403	11	7	NA
ENSMUSG00000078760	11	7	NA
ENSMUSG00000078759	11	7	NA
ENSMUSG00000078398	11	7	NA
ENSMUSG00000044903	11	7	NA
ENSMUSG00000057513	11	7	NA
ENSMUSG00000074332	11	7	NA
ENSMUSG00000058685	11	7	NA
ENSMUSG00000070796	11	7	unbiased
ENSMUSG00000057540	11	7	NA
ENSMUSG00000078758	11	7	NA
ENSMUSG00000066407	11	7	NA
ENSMUSG00000053541	11	7	NA
ENSMUSG00000078690	11	7	unbiased
ENSMUSG00000058399	11	7	NA
ENSMUSG00000054102	11	7	female
ENSMUSG00000074289	11	7	NA
ENSMUSG00000004540	11	7	unbiased
ENSMUSG00000066723	11	7	NA
ENSMUSG00000078698	11	7	unbiased
ENSMUSG00000074291	11	7	NA
ENSMUSG00000030463	11	7	male
ENSMUSG00000058014	11	7	NA
ENSMUSG00000074295	11	7	NA
ENSMUSG00000074023	11	7	NA
ENSMUSG00000074169	11	7	NA
ENSMUSG00000074166	11	7	NA
ENSMUSG00000047348	11	7	NA
ENSMUSG00000047370	11	7	NA
ENSMUSG00000074283	11	7	unbiased
ENSMUSG00000054040	11	7	NA
ENSMUSG00000061026	11	7	NA
ENSMUSG00000074191	11	7	NA
ENSMUSG00000030373	11	7	NA
ENSMUSG00000046411	11	7	NA
ENSMUSG00000046438	11	7	NA
ENSMUSG00000074188	11	7	NA
ENSMUSG00000064231	11	7	NA
ENSMUSG00000061127	11	7	NA
ENSMUSG00000064223	11	7	NA
ENSMUSG00000070550	11	7	NA
ENSMUSG00000039854	11	7	NA
ENSMUSG00000074254	11	7	NA
ENSMUSG00000047031	11	7	NA
ENSMUSG00000030378	11	7	unbiased
ENSMUSG00000070551	11	7	NA
ENSMUSG00000044609	11	7	NA
ENSMUSG00000061795	11	7	NA
ENSMUSG00000072312	11	7	NA
ENSMUSG00000066620	11	7	NA
ENSMUSG00000072259	11	7	NA
ENSMUSG00000079891	11	7	NA
ENSMUSG00000079892	11	7	NA
ENSMUSG00000079893	11	7	NA
ENSMUSG00000074189	11	7	NA
ENSMUSG00000074308	11	7	NA
ENSMUSG00000074321	11	7	NA
ENSMUSG00000074322	11	7	NA
ENSMUSG00000066772	11	7	NA
ENSMUSG00000074325	11	7	NA
ENSMUSG00000074326	11	7	NA
ENSMUSG00000078419	11	7	NA
ENSMUSG00000078413	11	7	NA
ENSMUSG00000078412	11	7	NA
ENSMUSG00000078791	11	7	NA
ENSMUSG00000078409	11	7	NA
ENSMUSG00000078636	11	7	NA
ENSMUSG00000057946	11	7	NA
ENSMUSG00000079890	11	7	NA
ENSMUSG00000079889	11	7	NA
ENSMUSG00000074296	11	7	NA
ENSMUSG00000074160	11	7	NA
ENSMUSG00000003505	11	7	unbiased
ENSMUSG00000070621	11	7	NA
ENSMUSG00000072241	11	7	NA
ENSMUSG00000074304	11	7	NA
ENSMUSG00000078613	11	7	NA
ENSMUSG00000054310	11	7	NA
ENSMUSG00000074306	11	7	NA
ENSMUSG00000074309	11	7	NA
ENSMUSG00000074310	11	7	NA
ENSMUSG00000066586	11	7	NA
ENSMUSG00000074312	11	7	NA
ENSMUSG00000074314	11	7	NA
ENSMUSG00000074316	11	7	NA
ENSMUSG00000074317	11	7	NA
ENSMUSG00000074330	11	7	NA
ENSMUSG00000071952	11	7	NA
ENSMUSG00000080103	11	7	NA
ENSMUSG00000080101	11	7	NA
ENSMUSG00000080100	11	7	NA
ENSMUSG00000080099	11	7	NA
ENSMUSG00000080098	11	7	NA
ENSMUSG00000080097	11	7	NA
ENSMUSG00000062369	11	7	NA
ENSMUSG00000078801	11	7	NA
ENSMUSG00000078802	11	7	NA
ENSMUSG00000080096	11	7	NA
ENSMUSG00000080095	11	7	NA
ENSMUSG00000080093	11	7	NA
ENSMUSG00000080092	11	7	NA
ENSMUSG00000080104	11	7	NA
ENSMUSG00000080105	11	7	NA
ENSMUSG00000057195	11	7	male
ENSMUSG00000066180	11	7	NA
ENSMUSG00000068480	11	7	NA
ENSMUSG00000044141	11	7	NA
ENSMUSG00000078799	11	7	NA
ENSMUSG00000074608	11	7	NA
ENSMUSG00000080112	11	7	NA
ENSMUSG00000080111	11	7	NA
ENSMUSG00000080110	11	7	NA
ENSMUSG00000080109	11	7	NA
ENSMUSG00000080108	11	7	NA
ENSMUSG00000080107	11	7	NA
ENSMUSG00000080106	11	7	NA
ENSMUSG00000078803	11	7	NA
ENSMUSG00000080090	11	7	NA
ENSMUSG00000080089	11	7	NA
ENSMUSG00000070835	11	7	NA
ENSMUSG00000060161	11	7	male
ENSMUSG00000062536	11	7	NA
ENSMUSG00000070841	11	7	NA
ENSMUSG00000070844	11	7	NA
ENSMUSG00000073902	11	7	NA
ENSMUSG00000073901	11	7	NA
ENSMUSG00000023185	11	7	unbiased
ENSMUSG00000062483	11	7	NA
ENSMUSG00000050650	11	7	unbiased
ENSMUSG00000070848	11	7	NA
ENSMUSG00000038968	11	7	male
ENSMUSG00000070849	11	7	NA
ENSMUSG00000080102	11	7	NA
ENSMUSG00000041596	11	7	NA
ENSMUSG00000080088	11	7	NA
ENSMUSG00000080087	11	7	NA
ENSMUSG00000078804	11	7	NA
ENSMUSG00000078806	11	7	NA
ENSMUSG00000080085	11	7	NA
ENSMUSG00000055452	11	7	NA
ENSMUSG00000073904	11	7	NA
ENSMUSG00000070826	11	7	NA
ENSMUSG00000078808	11	7	unbiased
ENSMUSG00000074311	11	7	NA
ENSMUSG00000074547	11	7	NA
ENSMUSG00000070827	11	7	NA
ENSMUSG00000070828	11	7	NA
ENSMUSG00000070850	11	7	NA
ENSMUSG00000050425	11	7	NA
ENSMUSG00000049123	11	7	NA
ENSMUSG00000080177	11	7	NA
ENSMUSG00000073938	11	7	NA
ENSMUSG00000051591	11	7	NA
ENSMUSG00000048312	11	7	NA
ENSMUSG00000056777	11	7	NA
ENSMUSG00000080175	11	7	NA
ENSMUSG00000080174	11	7	NA
ENSMUSG00000042668	11	7	NA
ENSMUSG00000080163	11	7	NA
ENSMUSG00000059319	11	7	NA
ENSMUSG00000074393	11	7	NA
ENSMUSG00000042466	11	7	NA
ENSMUSG00000058976	11	7	NA
ENSMUSG00000078778	11	7	NA
ENSMUSG00000063177	11	7	male
ENSMUSG00000074369	11	7	NA
ENSMUSG00000074370	11	7	NA
ENSMUSG00000070811	11	7	NA
ENSMUSG00000078080	11	7	NA
ENSMUSG00000078088	11	7	NA
ENSMUSG00000063305	11	7	NA
ENSMUSG00000074371	11	7	NA
ENSMUSG00000071459	11	7	NA
ENSMUSG00000044485	11	7	unbiased
ENSMUSG00000074372	11	7	NA
ENSMUSG00000080178	11	7	NA
ENSMUSG00000078792	11	7	NA
ENSMUSG00000080147	11	7	NA
ENSMUSG00000068962	11	7	NA
ENSMUSG00000078793	11	7	NA
ENSMUSG00000074402	11	7	NA
ENSMUSG00000060420	11	7	unbiased
ENSMUSG00000048574	11	7	NA
ENSMUSG00000080145	11	7	NA
ENSMUSG00000043066	11	7	NA
ENSMUSG00000048398	11	7	unbiased
ENSMUSG00000073929	11	7	NA
ENSMUSG00000055942	11	7	NA
ENSMUSG00000074401	11	7	NA
ENSMUSG00000080158	11	7	NA
ENSMUSG00000080160	11	7	NA
ENSMUSG00000062598	11	7	NA
ENSMUSG00000080149	11	7	NA
ENSMUSG00000080148	11	7	NA
ENSMUSG00000078790	11	7	NA
ENSMUSG00000061969	11	6	NA
ENSMUSG00000072779	11	6	NA
ENSMUSG00000059364	11	6	NA
ENSMUSG00000030147	11	6	female
ENSMUSG00000079501	11	6	NA
ENSMUSG00000052262	11	6	unbiased
ENSMUSG00000078177	11	6	NA
ENSMUSG00000060816	11	6	NA
ENSMUSG00000063974	11	6	NA
ENSMUSG00000072829	11	6	NA
ENSMUSG00000062546	11	6	NA
ENSMUSG00000080283	11	6	NA
ENSMUSG00000059375	11	6	NA
ENSMUSG00000047203	11	6	unbiased
ENSMUSG00000080305	11	6	NA
ENSMUSG00000079541	11	6	NA
ENSMUSG00000079543	11	6	NA
ENSMUSG00000030363	11	6	NA
ENSMUSG00000057144	11	6	unbiased
ENSMUSG00000072655	11	6	NA
ENSMUSG00000079343	11	6	NA
ENSMUSG00000064018	11	6	NA
ENSMUSG00000030143	11	6	NA
ENSMUSG00000061481	11	6	NA
ENSMUSG00000060699	11	6	NA
ENSMUSG00000030325	11	6	male
ENSMUSG00000063812	11	6	NA
ENSMUSG00000057220	11	6	NA
ENSMUSG00000057370	11	6	NA
ENSMUSG00000057592	11	6	NA
ENSMUSG00000068262	11	6	NA
ENSMUSG00000073028	11	6	NA
ENSMUSG00000060416	11	6	NA
ENSMUSG00000060782	11	6	NA
ENSMUSG00000079967	11	6	NA
ENSMUSG00000030141	11	6	NA
ENSMUSG00000080257	11	6	NA
ENSMUSG00000068474	11	6	NA
ENSMUSG00000068425	11	6	NA
ENSMUSG00000068475	11	6	male
ENSMUSG00000036996	11	6	NA
ENSMUSG00000079959	11	6	NA
ENSMUSG00000079969	11	6	NA
ENSMUSG00000080040	11	6	NA
ENSMUSG00000079958	11	6	NA
ENSMUSG00000080032	11	6	NA
ENSMUSG00000045291	11	6	female
ENSMUSG00000079957	11	6	NA
ENSMUSG00000068689	11	6	NA
ENSMUSG00000057223	11	6	NA
ENSMUSG00000067888	11	6	NA
ENSMUSG00000071428	11	6	NA
ENSMUSG00000079942	11	6	NA
ENSMUSG00000037827	11	6	NA
ENSMUSG00000080035	11	6	NA
ENSMUSG00000057981	11	6	NA
ENSMUSG00000057612	11	6	NA
ENSMUSG00000057697	11	6	male
ENSMUSG00000080038	11	6	NA
ENSMUSG00000062477	11	6	NA
ENSMUSG00000060552	11	6	NA
ENSMUSG00000079439	11	5	NA
ENSMUSG00000079127	11	5	NA
ENSMUSG00000079999	11	5	NA
ENSMUSG00000079422	11	5	NA
ENSMUSG00000072815	11	5	NA
ENSMUSG00000072818	11	5	NA
ENSMUSG00000057627	11	5	NA
ENSMUSG00000072816	11	5	NA
ENSMUSG00000041505	11	5	NA
ENSMUSG00000073497	11	5	NA
ENSMUSG00000054588	11	5	NA
ENSMUSG00000033219	11	5	NA
ENSMUSG00000072814	11	5	NA
ENSMUSG00000073208	11	5	NA
ENSMUSG00000070519	11	5	NA
ENSMUSG00000079423	11	5	NA
ENSMUSG00000067047	11	5	NA
ENSMUSG00000060730	11	5	NA
ENSMUSG00000080261	11	5	NA
ENSMUSG00000072774	11	5	NA
ENSMUSG00000060204	11	5	NA
ENSMUSG00000063935	11	5	female
ENSMUSG00000042647	11	5	male
ENSMUSG00000072766	11	5	NA
ENSMUSG00000080234	11	5	NA
ENSMUSG00000059565	11	5	NA
ENSMUSG00000073226	11	5	NA
ENSMUSG00000072813	11	5	NA
ENSMUSG00000079089	11	5	NA
ENSMUSG00000070419	11	5	NA
ENSMUSG00000059064	11	5	NA
ENSMUSG00000038656	11	5	unbiased
ENSMUSG00000073212	11	5	NA
ENSMUSG00000070408	11	5	NA
ENSMUSG00000079094	11	5	NA
ENSMUSG00000080042	11	5	NA
ENSMUSG00000069355	11	5	NA
ENSMUSG00000080041	11	5	NA
ENSMUSG00000074008	11	5	NA
ENSMUSG00000043618	11	5	NA
ENSMUSG00000057685	11	5	NA
ENSMUSG00000073510	11	5	NA
ENSMUSG00000080294	11	5	NA
ENSMUSG00000054123	11	5	NA
ENSMUSG00000069720	11	5	NA
ENSMUSG00000078187	11	5	NA
ENSMUSG00000059179	11	5	NA
ENSMUSG00000054284	11	5	NA
ENSMUSG00000075546	11	5	NA
ENSMUSG00000072188	11	5	NA
ENSMUSG00000075552	11	5	NA
ENSMUSG00000057244	11	5	NA
ENSMUSG00000080252	11	5	NA
ENSMUSG00000080216	11	5	NA
ENSMUSG00000079096	11	5	NA
ENSMUSG00000070677	11	5	NA
ENSMUSG00000063739	11	5	NA
ENSMUSG00000079093	11	5	NA
ENSMUSG00000078182	11	5	NA
ENSMUSG00000080039	11	5	NA
ENSMUSG00000072822	11	5	NA
ENSMUSG00000073499	11	5	NA
ENSMUSG00000073509	11	5	NA
ENSMUSG00000044058	11	5	NA
ENSMUSG00000072821	11	5	NA
ENSMUSG00000079362	11	5	NA
ENSMUSG00000080036	11	5	NA
ENSMUSG00000067855	11	5	male
ENSMUSG00000072576	11	5	NA
ENSMUSG00000079090	11	5	NA
ENSMUSG00000072826	11	5	NA
ENSMUSG00000080296	11	5	NA
ENSMUSG00000079129	11	5	NA
ENSMUSG00000029620	11	5	NA
ENSMUSG00000079091	11	5	NA
ENSMUSG00000061707	11	5	NA
ENSMUSG00000048703	11	5	NA
ENSMUSG00000073724	11	4	NA
ENSMUSG00000073874	11	4	NA
ENSMUSG00000052520	11	4	unbiased
ENSMUSG00000066252	11	4	NA
ENSMUSG00000078746	11	4	NA
ENSMUSG00000078747	11	4	NA
ENSMUSG00000078748	11	4	NA
ENSMUSG00000073763	11	4	NA
ENSMUSG00000073817	11	4	NA
ENSMUSG00000073764	11	4	unbiased
ENSMUSG00000073810	11	4	NA
ENSMUSG00000073768	11	4	NA
ENSMUSG00000073723	11	4	NA
ENSMUSG00000066031	11	4	female
ENSMUSG00000066202	11	4	NA
ENSMUSG00000073769	11	4	NA
ENSMUSG00000078728	11	4	NA
ENSMUSG00000078731	11	4	NA
ENSMUSG00000078732	11	4	NA
ENSMUSG00000073880	11	4	NA
ENSMUSG00000073884	11	4	NA
ENSMUSG00000078685	11	4	NA
ENSMUSG00000066137	11	4	unbiased
ENSMUSG00000078733	11	4	NA
ENSMUSG00000078734	11	4	NA
ENSMUSG00000073878	11	4	NA
ENSMUSG00000066136	11	4	NA
ENSMUSG00000078727	11	4	NA
ENSMUSG00000078726	11	4	NA
ENSMUSG00000063245	11	4	NA
ENSMUSG00000073883	11	4	NA
ENSMUSG00000078725	11	4	NA
ENSMUSG00000073882	11	4	NA
ENSMUSG00000073881	11	4	NA
ENSMUSG00000078729	11	4	NA
ENSMUSG00000078702	11	4	NA
ENSMUSG00000066688	11	4	NA
ENSMUSG00000034359	11	4	NA
ENSMUSG00000078735	11	4	NA
ENSMUSG00000078738	11	4	NA
ENSMUSG00000078739	11	4	NA
ENSMUSG00000078740	11	4	NA
ENSMUSG00000078744	11	4	NA
ENSMUSG00000073830	11	4	NA
ENSMUSG00000066107	11	4	NA
ENSMUSG00000073826	11	4	NA
ENSMUSG00000078745	11	4	NA
ENSMUSG00000073818	11	4	NA
ENSMUSG00000073868	11	4	NA
ENSMUSG00000073869	11	4	NA
ENSMUSG00000078679	11	4	NA
ENSMUSG00000073877	11	4	NA
ENSMUSG00000073876	11	4	NA
ENSMUSG00000073875	11	4	NA
ENSMUSG00000073873	11	4	NA
ENSMUSG00000073872	11	4	NA
ENSMUSG00000078678	11	4	NA
ENSMUSG00000073871	11	4	NA
ENSMUSG00000078736	11	4	NA
ENSMUSG00000066201	11	4	NA
ENSMUSG00000078070	11	4	NA
ENSMUSG00000067916	11	4	NA
ENSMUSG00000057977	11	4	NA
ENSMUSG00000070618	11	4	NA
ENSMUSG00000070617	11	4	NA
ENSMUSG00000036749	11	4	NA
ENSMUSG00000054351	11	4	NA
ENSMUSG00000072143	11	4	NA
ENSMUSG00000078498	11	4	NA
ENSMUSG00000079860	11	4	NA
ENSMUSG00000079859	11	4	NA
ENSMUSG00000079858	11	4	NA
ENSMUSG00000028359	11	4	unbiased
ENSMUSG00000079857	11	4	NA
ENSMUSG00000079856	11	4	NA
ENSMUSG00000079855	11	4	NA
ENSMUSG00000079854	11	4	NA
ENSMUSG00000078510	11	4	NA
ENSMUSG00000067919	11	4	NA
ENSMUSG00000078367	11	4	NA
ENSMUSG00000078366	11	4	NA
ENSMUSG00000078069	11	4	NA
ENSMUSG00000070946	11	4	NA
ENSMUSG00000070917	11	4	NA
ENSMUSG00000059343	11	4	male
ENSMUSG00000080154	11	4	NA
ENSMUSG00000038330	11	4	female
ENSMUSG00000078160	11	4	NA
ENSMUSG00000023263	11	4	male
ENSMUSG00000059218	11	4	NA
ENSMUSG00000078238	11	4	NA
ENSMUSG00000055406	11	4	NA
ENSMUSG00000028590	11	4	unbiased
ENSMUSG00000079980	11	4	NA
ENSMUSG00000079976	11	4	NA
ENSMUSG00000078360	11	4	NA
ENSMUSG00000078361	11	4	NA
ENSMUSG00000078362	11	4	NA
ENSMUSG00000078513	11	4	NA
ENSMUSG00000046262	11	4	female
ENSMUSG00000078598	11	4	NA
ENSMUSG00000078663	11	4	NA
ENSMUSG00000078509	11	4	NA
ENSMUSG00000078662	11	4	NA
ENSMUSG00000078642	11	4	NA
ENSMUSG00000060989	11	4	NA
ENSMUSG00000078576	11	4	NA
ENSMUSG00000078575	11	4	NA
ENSMUSG00000078660	11	4	NA
ENSMUSG00000046435	11	4	NA
ENSMUSG00000078599	11	4	NA
ENSMUSG00000073819	11	4	NA
ENSMUSG00000061396	11	4	NA
ENSMUSG00000074425	11	3	NA
ENSMUSG00000064315	11	3	NA
ENSMUSG00000079953	11	3	NA
ENSMUSG00000074483	11	3	NA
ENSMUSG00000078684	11	3	NA
ENSMUSG00000049230	11	3	NA
ENSMUSG00000074486	11	3	NA
ENSMUSG00000078682	11	3	NA
ENSMUSG00000074589	11	3	unbiased
ENSMUSG00000079951	11	3	NA
ENSMUSG00000048106	11	3	female
ENSMUSG00000040573	11	3	NA
ENSMUSG00000080005	11	3	NA
ENSMUSG00000080006	11	3	NA
ENSMUSG00000057829	11	3	NA
ENSMUSG00000049231	11	3	NA
ENSMUSG00000040809	11	3	male
ENSMUSG00000062200	11	3	NA
ENSMUSG00000080014	11	3	NA
ENSMUSG00000079948	11	3	NA
ENSMUSG00000070490	11	3	NA
ENSMUSG00000080009	11	3	NA
ENSMUSG00000027564	11	3	male
ENSMUSG00000074445	11	3	NA
ENSMUSG00000078162	11	3	NA
ENSMUSG00000048916	11	3	NA
ENSMUSG00000060899	11	3	NA
ENSMUSG00000074621	11	3	NA
ENSMUSG00000068999	11	3	NA
ENSMUSG00000072381	11	3	NA
ENSMUSG00000078175	11	3	NA
ENSMUSG00000078691	11	3	NA
ENSMUSG00000042165	11	3	NA
ENSMUSG00000068969	11	3	NA
ENSMUSG00000068893	11	3	NA
ENSMUSG00000080142	11	3	NA
ENSMUSG00000070360	11	3	NA
ENSMUSG00000080170	11	3	NA
ENSMUSG00000078665	11	3	NA
ENSMUSG00000074655	11	3	NA
ENSMUSG00000059776	11	3	NA
ENSMUSG00000080138	11	3	NA
ENSMUSG00000079988	11	2	NA
ENSMUSG00000061704	11	2	NA
ENSMUSG00000057447	11	2	NA
ENSMUSG00000074787	11	2	NA
ENSMUSG00000053277	11	2	NA
ENSMUSG00000068479	11	2	female
ENSMUSG00000075064	11	2	NA
ENSMUSG00000074946	11	2	NA
ENSMUSG00000068641	11	2	NA
ENSMUSG00000079987	11	2	NA
ENSMUSG00000062272	11	2	NA
ENSMUSG00000062651	11	2	male
ENSMUSG00000068686	11	2	NA
ENSMUSG00000070856	11	2	NA
ENSMUSG00000074529	11	2	NA
ENSMUSG00000070854	11	2	NA
ENSMUSG00000080223	11	2	NA
ENSMUSG00000026985	11	2	unbiased
ENSMUSG00000074963	11	2	NA
ENSMUSG00000079006	11	2	NA
ENSMUSG00000075006	11	2	NA
ENSMUSG00000059023	11	2	NA
ENSMUSG00000080114	11	2	NA
ENSMUSG00000078891	11	2	NA
ENSMUSG00000079005	11	2	NA
ENSMUSG00000063377	11	2	NA
ENSMUSG00000063364	11	2	unbiased
ENSMUSG00000075177	11	2	NA
ENSMUSG00000047363	11	2	unbiased
ENSMUSG00000079250	11	2	NA
ENSMUSG00000060741	11	2	NA
ENSMUSG00000075238	11	2	NA
ENSMUSG00000079248	11	2	NA
ENSMUSG00000060742	11	2	NA
ENSMUSG00000079256	11	2	NA
ENSMUSG00000075135	11	2	NA
ENSMUSG00000075214	11	2	NA
ENSMUSG00000079496	11	2	NA
ENSMUSG00000075237	11	2	NA
ENSMUSG00000061875	11	2	NA
ENSMUSG00000075141	11	2	NA
ENSMUSG00000075176	11	2	NA
ENSMUSG00000079239	11	2	NA
ENSMUSG00000079238	11	2	NA
ENSMUSG00000067352	11	2	NA
ENSMUSG00000079870	11	2	NA
ENSMUSG00000079249	11	2	NA
ENSMUSG00000047965	11	2	NA
ENSMUSG00000075185	11	2	NA
ENSMUSG00000079871	11	2	NA
ENSMUSG00000064193	11	2	NA
ENSMUSG00000079247	11	2	NA
ENSMUSG00000075100	11	2	NA
ENSMUSG00000075387	11	2	NA
ENSMUSG00000059326	11	19	female
ENSMUSG00000063754	11	19	NA
ENSMUSG00000024766	11	19	female
ENSMUSG00000067351	11	19	NA
ENSMUSG00000067656	11	19	unbiased
ENSMUSG00000057605	11	19	NA
ENSMUSG00000080260	11	19	NA
ENSMUSG00000052562	11	19	NA
ENSMUSG00000038155	11	19	NA
ENSMUSG00000032808	11	19	unbiased
ENSMUSG00000051156	11	19	NA
ENSMUSG00000024675	11	19	unbiased
ENSMUSG00000067225	11	19	unbiased
ENSMUSG00000078106	11	19	NA
ENSMUSG00000058927	11	19	NA
ENSMUSG00000062195	11	19	NA
ENSMUSG00000025003	11	19	unbiased
ENSMUSG00000079344	11	19	NA
ENSMUSG00000071640	11	19	NA
ENSMUSG00000058607	11	19	NA
ENSMUSG00000062199	11	19	NA
ENSMUSG00000079935	11	19	NA
ENSMUSG00000063324	11	19	NA
ENSMUSG00000079937	11	19	NA
ENSMUSG00000042248	11	19	unbiased
ENSMUSG00000067297	11	19	unbiased
ENSMUSG00000037603	11	19	NA
ENSMUSG00000062742	11	18	NA
ENSMUSG00000069439	11	18	NA
ENSMUSG00000061928	11	18	NA
ENSMUSG00000061684	11	18	NA
ENSMUSG00000056849	11	18	NA
ENSMUSG00000055795	11	18	NA
ENSMUSG00000069324	11	18	NA
ENSMUSG00000062962	11	18	NA
ENSMUSG00000069379	11	18	NA
ENSMUSG00000043223	11	18	NA
ENSMUSG00000072528	11	18	NA
ENSMUSG00000054072	11	18	female
ENSMUSG00000063514	11	18	NA
ENSMUSG00000073524	11	18	NA
ENSMUSG00000073525	11	18	NA
ENSMUSG00000034774	11	18	NA
ENSMUSG00000079943	11	18	NA
ENSMUSG00000073526	11	18	NA
ENSMUSG00000062196	11	18	NA
ENSMUSG00000071867	11	18	NA
ENSMUSG00000079968	11	18	NA
ENSMUSG00000073521	11	18	NA
ENSMUSG00000079962	11	18	NA
ENSMUSG00000079965	11	18	NA
ENSMUSG00000079964	11	18	NA
ENSMUSG00000079945	11	18	NA
ENSMUSG00000073572	11	18	NA
ENSMUSG00000068606	11	18	NA
ENSMUSG00000080309	11	17	NA
ENSMUSG00000033450	11	17	NA
ENSMUSG00000080312	11	17	NA
ENSMUSG00000057417	11	17	female
ENSMUSG00000058869	11	17	NA
ENSMUSG00000073397	11	17	NA
ENSMUSG00000073407	11	17	NA
ENSMUSG00000056910	11	17	NA
ENSMUSG00000073403	11	17	NA
ENSMUSG00000073406	11	17	unbiased
ENSMUSG00000073455	11	17	NA
ENSMUSG00000080311	11	17	NA
ENSMUSG00000080310	11	17	NA
ENSMUSG00000080313	11	17	NA
ENSMUSG00000063383	11	17	NA
ENSMUSG00000058124	11	17	NA
ENSMUSG00000008686	11	17	NA
ENSMUSG00000073444	11	17	NA
ENSMUSG00000073445	11	17	NA
ENSMUSG00000080314	11	17	NA
ENSMUSG00000073366	11	17	NA
ENSMUSG00000058176	11	17	NA
ENSMUSG00000073471	11	17	NA
ENSMUSG00000033972	11	17	unbiased
ENSMUSG00000073469	11	17	NA
ENSMUSG00000000579	11	17	NA
ENSMUSG00000058640	11	17	NA
ENSMUSG00000057203	11	17	NA
ENSMUSG00000062036	11	17	NA
ENSMUSG00000079414	11	17	unbiased
ENSMUSG00000079899	11	17	NA
ENSMUSG00000062365	11	17	NA
ENSMUSG00000036648	11	17	NA
ENSMUSG00000068604	11	17	NA
ENSMUSG00000055413	11	17	NA
ENSMUSG00000052126	11	17	NA
ENSMUSG00000062472	11	17	NA
ENSMUSG00000054142	11	17	NA
ENSMUSG00000079983	11	17	NA
ENSMUSG00000043346	11	17	NA
ENSMUSG00000079902	11	17	NA
ENSMUSG00000071266	11	17	female
ENSMUSG00000044645	11	17	NA
ENSMUSG00000067843	11	17	NA
ENSMUSG00000079981	11	17	NA
ENSMUSG00000079984	11	17	NA
ENSMUSG00000044538	11	17	NA
ENSMUSG00000079905	11	17	NA
ENSMUSG00000079903	11	17	NA
ENSMUSG00000037548	11	17	unbiased
ENSMUSG00000079492	11	17	NA
ENSMUSG00000071276	11	17	NA
ENSMUSG00000071273	11	17	NA
ENSMUSG00000073980	11	17	NA
ENSMUSG00000079721	11	17	NA
ENSMUSG00000055660	11	17	male
ENSMUSG00000079729	11	17	NA
ENSMUSG00000067575	11	17	NA
ENSMUSG00000066057	11	17	unbiased
ENSMUSG00000071052	11	17	NA
ENSMUSG00000079718	11	17	NA
ENSMUSG00000016283	11	17	NA
ENSMUSG00000061242	11	17	NA
ENSMUSG00000035868	11	17	female
ENSMUSG00000023795	11	17	NA
ENSMUSG00000052469	11	17	NA
ENSMUSG00000056875	11	17	NA
ENSMUSG00000079735	11	17	NA
ENSMUSG00000079734	11	17	NA
ENSMUSG00000079712	11	17	NA
ENSMUSG00000079733	11	17	NA
ENSMUSG00000071077	11	17	NA
ENSMUSG00000079732	11	17	NA
ENSMUSG00000079731	11	17	NA
ENSMUSG00000079730	11	17	NA
ENSMUSG00000059912	11	17	NA
ENSMUSG00000066983	11	17	NA
ENSMUSG00000079912	11	16	NA
ENSMUSG00000079597	11	16	NA
ENSMUSG00000071671	11	16	NA
ENSMUSG00000060811	11	16	NA
ENSMUSG00000075269	11	16	male
ENSMUSG00000079585	11	16	NA
ENSMUSG00000050158	11	16	NA
ENSMUSG00000079535	11	16	NA
ENSMUSG00000079594	11	16	NA
ENSMUSG00000052192	11	16	NA
ENSMUSG00000071561	11	16	NA
ENSMUSG00000079978	11	16	NA
ENSMUSG00000063163	11	16	NA
ENSMUSG00000071475	11	16	NA
ENSMUSG00000068599	11	16	NA
ENSMUSG00000068674	11	16	NA
ENSMUSG00000078097	11	16	NA
ENSMUSG00000078093	11	16	NA
ENSMUSG00000059657	11	16	unbiased
ENSMUSG00000080081	11	15	NA
ENSMUSG00000072426	11	15	unbiased
ENSMUSG00000080208	11	15	NA
ENSMUSG00000022582	11	15	NA
ENSMUSG00000022583	11	15	unbiased
ENSMUSG00000078858	11	15	NA
ENSMUSG00000050978	11	15	NA
ENSMUSG00000061848	11	15	NA
ENSMUSG00000046162	11	15	NA
ENSMUSG00000072489	11	15	NA
ENSMUSG00000057138	11	15	unbiased
ENSMUSG00000080198	11	15	NA
ENSMUSG00000050982	11	15	NA
ENSMUSG00000079025	11	15	unbiased
ENSMUSG00000047565	11	15	male
ENSMUSG00000025922	11	15	NA
ENSMUSG00000071714	11	15	female
ENSMUSG00000068086	11	15	unbiased
ENSMUSG00000062543	11	15	male
ENSMUSG00000068348	11	15	NA
ENSMUSG00000068349	11	15	NA
ENSMUSG00000078289	11	15	NA
ENSMUSG00000075602	11	15	female
ENSMUSG00000058057	11	15	NA
ENSMUSG00000070713	11	15	NA
ENSMUSG00000078300	11	15	NA
ENSMUSG00000057346	11	15	NA
ENSMUSG00000080206	11	15	NA
ENSMUSG00000061490	11	15	NA
ENSMUSG00000058518	11	14	NA
ENSMUSG00000053961	11	14	male
ENSMUSG00000079273	11	14	NA
ENSMUSG00000052790	11	14	NA
ENSMUSG00000058430	11	14	NA
ENSMUSG00000061510	11	14	NA
ENSMUSG00000021927	11	14	NA
ENSMUSG00000078126	11	14	NA
ENSMUSG00000060615	11	14	male
ENSMUSG00000057445	11	14	NA
ENSMUSG00000075245	11	14	NA
ENSMUSG00000075515	11	14	NA
ENSMUSG00000021867	11	14	NA
ENSMUSG00000050766	11	14	male
ENSMUSG00000052334	11	14	NA
ENSMUSG00000060143	11	14	NA
ENSMUSG00000060108	11	14	NA
ENSMUSG00000058581	11	14	NA
ENSMUSG00000021741	11	14	NA
ENSMUSG00000063885	11	14	NA
ENSMUSG00000059835	11	14	NA
ENSMUSG00000059827	11	14	NA
ENSMUSG00000060680	11	14	NA
ENSMUSG00000072674	11	14	NA
ENSMUSG00000038925	11	14	female
ENSMUSG00000079410	11	14	NA
ENSMUSG00000079329	11	14	NA
ENSMUSG00000079409	11	14	NA
ENSMUSG00000079408	11	14	NA
ENSMUSG00000079407	11	14	NA
ENSMUSG00000079406	11	14	NA
ENSMUSG00000079405	11	14	NA
ENSMUSG00000079404	11	14	NA
ENSMUSG00000079403	11	14	NA
ENSMUSG00000079402	11	14	NA
ENSMUSG00000079400	11	14	NA
ENSMUSG00000072728	11	14	NA
ENSMUSG00000049235	11	14	NA
ENSMUSG00000072676	11	14	NA
ENSMUSG00000079266	11	14	NA
ENSMUSG00000079267	11	14	NA
ENSMUSG00000079270	11	14	NA
ENSMUSG00000072714	11	14	NA
ENSMUSG00000079271	11	14	NA
ENSMUSG00000079272	11	14	NA
ENSMUSG00000072735	11	14	NA
ENSMUSG00000072741	11	14	NA
ENSMUSG00000072742	11	14	NA
ENSMUSG00000072744	11	14	NA
ENSMUSG00000079379	11	14	NA
ENSMUSG00000079399	11	14	NA
ENSMUSG00000079398	11	14	NA
ENSMUSG00000079377	11	14	NA
ENSMUSG00000079376	11	14	NA
ENSMUSG00000079375	11	14	NA
ENSMUSG00000079372	11	14	NA
ENSMUSG00000080236	11	14	NA
ENSMUSG00000079371	11	14	NA
ENSMUSG00000079368	11	14	NA
ENSMUSG00000000606	11	14	NA
ENSMUSG00000080241	11	14	NA
ENSMUSG00000080248	11	14	NA
ENSMUSG00000079365	11	14	NA
ENSMUSG00000080249	11	14	NA
ENSMUSG00000079378	11	14	NA
ENSMUSG00000079380	11	14	NA
ENSMUSG00000079397	11	14	NA
ENSMUSG00000079396	11	14	NA
ENSMUSG00000079394	11	14	NA
ENSMUSG00000079392	11	14	NA
ENSMUSG00000079391	11	14	NA
ENSMUSG00000079390	11	14	NA
ENSMUSG00000079389	11	14	NA
ENSMUSG00000079386	11	14	NA
ENSMUSG00000048502	11	14	NA
ENSMUSG00000079385	11	14	NA
ENSMUSG00000079383	11	14	NA
ENSMUSG00000079381	11	14	NA
ENSMUSG00000079360	11	14	NA
ENSMUSG00000072548	11	14	NA
ENSMUSG00000068506	11	14	NA
ENSMUSG00000071243	11	14	NA
ENSMUSG00000071244	11	14	NA
ENSMUSG00000072585	11	14	NA
ENSMUSG00000070448	11	14	NA
ENSMUSG00000072596	11	14	NA
ENSMUSG00000071262	11	14	unbiased
ENSMUSG00000072598	11	14	NA
ENSMUSG00000072145	11	14	NA
ENSMUSG00000071576	11	14	NA
ENSMUSG00000068777	11	14	NA
ENSMUSG00000072574	11	14	NA
ENSMUSG00000079925	11	14	NA
ENSMUSG00000079926	11	14	NA
ENSMUSG00000071616	11	14	NA
ENSMUSG00000079244	11	14	NA
ENSMUSG00000071613	11	14	NA
ENSMUSG00000071591	11	14	NA
ENSMUSG00000072601	11	14	unbiased
ENSMUSG00000072602	11	14	NA
ENSMUSG00000043248	11	14	NA
ENSMUSG00000072610	11	14	NA
ENSMUSG00000072609	11	14	NA
ENSMUSG00000079340	11	14	NA
ENSMUSG00000049546	11	14	male
ENSMUSG00000072607	11	14	NA
ENSMUSG00000072613	11	14	NA
ENSMUSG00000068399	11	14	NA
ENSMUSG00000079998	11	14	NA
ENSMUSG00000072608	11	14	NA
ENSMUSG00000072603	11	14	NA
ENSMUSG00000079265	11	14	NA
ENSMUSG00000080074	11	13	NA
ENSMUSG00000071292	11	13	NA
ENSMUSG00000060738	11	13	NA
ENSMUSG00000055360	11	13	NA
ENSMUSG00000072066	11	13	female
ENSMUSG00000063162	11	13	NA
ENSMUSG00000054266	11	13	unbiased
ENSMUSG00000069297	11	13	NA
ENSMUSG00000079920	11	13	NA
ENSMUSG00000060209	11	13	NA
ENSMUSG00000051037	11	13	female
ENSMUSG00000062737	11	13	NA
ENSMUSG00000071491	11	13	NA
ENSMUSG00000062705	11	13	male
ENSMUSG00000071493	11	13	NA
ENSMUSG00000021514	11	13	unbiased
ENSMUSG00000071466	11	13	NA
ENSMUSG00000071452	11	13	NA
ENSMUSG00000078311	11	13	NA
ENSMUSG00000071495	11	13	NA
ENSMUSG00000074832	11	13	NA
ENSMUSG00000078942	11	13	NA
ENSMUSG00000079944	11	13	NA
ENSMUSG00000060343	11	13	NA
ENSMUSG00000071490	11	13	NA
ENSMUSG00000078312	11	13	NA
ENSMUSG00000062461	11	13	NA
ENSMUSG00000074660	11	13	NA
ENSMUSG00000074834	11	13	NA
ENSMUSG00000069289	11	13	NA
ENSMUSG00000061829	11	13	NA
ENSMUSG00000074843	11	13	NA
ENSMUSG00000069290	11	13	NA
ENSMUSG00000069291	11	13	NA
ENSMUSG00000069293	11	13	NA
ENSMUSG00000047061	11	13	unbiased
ENSMUSG00000069288	11	13	NA
ENSMUSG00000055763	11	13	NA
ENSMUSG00000046932	11	13	NA
ENSMUSG00000056199	11	13	NA
ENSMUSG00000038327	11	13	NA
ENSMUSG00000056457	11	13	NA
ENSMUSG00000069196	11	13	NA
ENSMUSG00000069206	11	13	female
ENSMUSG00000074824	11	13	NA
ENSMUSG00000074826	11	13	NA
ENSMUSG00000052909	11	13	NA
ENSMUSG00000074847	11	13	NA
ENSMUSG00000069294	11	13	NA
ENSMUSG00000021306	11	13	female
ENSMUSG00000051723	11	13	NA
ENSMUSG00000048280	11	13	NA
ENSMUSG00000060024	11	13	NA
ENSMUSG00000062342	11	13	NA
ENSMUSG00000080213	11	13	NA
ENSMUSG00000061022	11	13	NA
ENSMUSG00000080076	11	13	NA
ENSMUSG00000080196	11	13	NA
ENSMUSG00000047889	11	13	NA
ENSMUSG00000078959	11	13	NA
ENSMUSG00000056882	11	13	NA
ENSMUSG00000066714	11	13	NA
ENSMUSG00000030446	11	13	NA
ENSMUSG00000080193	11	13	NA
ENSMUSG00000069299	11	13	NA
ENSMUSG00000047643	11	13	NA
ENSMUSG00000061988	11	13	NA
ENSMUSG00000074874	11	13	female
ENSMUSG00000080075	11	13	NA
ENSMUSG00000078997	11	13	NA
ENSMUSG00000063180	11	13	NA
ENSMUSG00000049669	11	13	NA
ENSMUSG00000064243	11	13	NA
ENSMUSG00000078994	11	13	female
ENSMUSG00000064063	11	13	male
ENSMUSG00000078996	11	13	NA
ENSMUSG00000075109	11	13	NA
ENSMUSG00000063269	11	13	NA
ENSMUSG00000078999	11	13	NA
ENSMUSG00000032999	11	13	female
ENSMUSG00000079092	11	13	NA
ENSMUSG00000063998	11	13	NA
ENSMUSG00000057707	11	13	NA
ENSMUSG00000062382	11	13	NA
ENSMUSG00000057799	11	13	NA
ENSMUSG00000079064	11	13	NA
ENSMUSG00000072910	11	12	NA
ENSMUSG00000071178	11	12	unbiased
ENSMUSG00000079015	11	12	unbiased
ENSMUSG00000079167	11	12	NA
ENSMUSG00000066569	11	12	NA
ENSMUSG00000079166	11	12	NA
ENSMUSG00000080212	11	12	NA
ENSMUSG00000072909	11	12	NA
ENSMUSG00000073184	11	12	NA
ENSMUSG00000073185	11	12	NA
ENSMUSG00000073187	11	12	NA
ENSMUSG00000078368	11	12	NA
ENSMUSG00000000701	11	12	NA
ENSMUSG00000078370	11	12	NA
ENSMUSG00000072905	11	12	NA
ENSMUSG00000079012	11	12	unbiased
ENSMUSG00000072907	11	12	NA
ENSMUSG00000078375	11	12	NA
ENSMUSG00000073194	11	12	NA
ENSMUSG00000078377	11	12	NA
ENSMUSG00000079153	11	12	NA
ENSMUSG00000071177	11	12	NA
ENSMUSG00000078374	11	12	NA
ENSMUSG00000079034	11	12	NA
ENSMUSG00000060863	11	12	NA
ENSMUSG00000066366	11	12	male
ENSMUSG00000066363	11	12	NA
ENSMUSG00000066359	11	12	unbiased
ENSMUSG00000073083	11	12	NA
ENSMUSG00000073079	11	12	NA
ENSMUSG00000080205	11	12	NA
ENSMUSG00000071126	11	12	NA
ENSMUSG00000079158	11	12	NA
ENSMUSG00000079159	11	12	NA
ENSMUSG00000059229	11	12	NA
ENSMUSG00000080210	11	12	NA
ENSMUSG00000066027	11	12	NA
ENSMUSG00000066489	11	12	NA
ENSMUSG00000079155	11	12	NA
ENSMUSG00000080079	11	12	NA
ENSMUSG00000079028	11	12	NA
ENSMUSG00000066389	11	12	NA
ENSMUSG00000079029	11	12	NA
ENSMUSG00000080078	11	12	NA
ENSMUSG00000079030	11	12	NA
ENSMUSG00000080211	11	12	NA
ENSMUSG00000072255	11	12	NA
ENSMUSG00000079031	11	12	NA
ENSMUSG00000080209	11	12	NA
ENSMUSG00000080187	11	12	NA
ENSMUSG00000073169	11	12	NA
ENSMUSG00000073182	11	12	NA
ENSMUSG00000071329	11	12	NA
ENSMUSG00000073164	11	12	NA
ENSMUSG00000073171	11	12	NA
ENSMUSG00000073160	11	12	NA
ENSMUSG00000071372	11	12	NA
ENSMUSG00000073159	11	12	NA
ENSMUSG00000079963	11	12	NA
ENSMUSG00000073158	11	12	NA
ENSMUSG00000035560	11	12	male
ENSMUSG00000079076	11	12	NA
ENSMUSG00000073157	11	12	NA
ENSMUSG00000059695	11	12	male
ENSMUSG00000053189	11	12	NA
ENSMUSG00000073166	11	12	NA
ENSMUSG00000041481	11	12	unbiased
ENSMUSG00000050974	11	12	NA
ENSMUSG00000073183	11	12	NA
ENSMUSG00000021208	11	12	unbiased
ENSMUSG00000078991	11	12	NA
ENSMUSG00000041449	11	12	NA
ENSMUSG00000073168	11	12	NA
ENSMUSG00000071216	11	12	NA
ENSMUSG00000060566	11	12	NA
ENSMUSG00000071217	11	12	NA
ENSMUSG00000062582	11	12	NA
ENSMUSG00000069899	11	11	NA
ENSMUSG00000009588	11	11	unbiased
ENSMUSG00000069892	11	11	NA
ENSMUSG00000079991	11	11	NA
ENSMUSG00000069816	11	11	NA
ENSMUSG00000069893	11	11	NA
ENSMUSG00000017211	11	11	male
ENSMUSG00000078965	11	11	NA
ENSMUSG00000073057	11	11	NA
ENSMUSG00000060170	11	11	NA
ENSMUSG00000034641	11	11	unbiased
ENSMUSG00000062204	11	11	NA
ENSMUSG00000048378	11	11	NA
ENSMUSG00000050667	11	11	NA
ENSMUSG00000040575	11	11	NA
ENSMUSG00000079876	11	11	NA
ENSMUSG00000057168	11	11	NA
ENSMUSG00000044639	11	11	NA
ENSMUSG00000078151	11	11	NA
ENSMUSG00000080189	11	11	NA
ENSMUSG00000020870	11	11	NA
ENSMUSG00000078154	11	11	NA
ENSMUSG00000024205	11	11	NA
ENSMUSG00000078921	11	11	NA
ENSMUSG00000032889	11	11	NA
ENSMUSG00000078693	11	11	NA
ENSMUSG00000078157	11	11	NA
ENSMUSG00000060630	11	11	unbiased
ENSMUSG00000078270	11	11	NA
ENSMUSG00000060925	11	11	NA
ENSMUSG00000009185	11	11	female
ENSMUSG00000079915	11	11	NA
ENSMUSG00000079916	11	11	NA
ENSMUSG00000064224	11	11	NA
ENSMUSG00000018986	11	11	unbiased
ENSMUSG00000072902	11	11	NA
ENSMUSG00000078922	11	11	NA
ENSMUSG00000048852	11	11	unbiased
ENSMUSG00000078264	11	11	NA
ENSMUSG00000078705	11	11	NA
ENSMUSG00000070601	11	10	NA
ENSMUSG00000078488	11	10	NA
ENSMUSG00000074859	11	10	NA
ENSMUSG00000074856	11	10	NA
ENSMUSG00000064317	11	10	NA
ENSMUSG00000059814	11	10	NA
ENSMUSG00000056219	11	10	NA
ENSMUSG00000074780	11	10	male
ENSMUSG00000078109	11	10	NA
ENSMUSG00000061488	11	10	NA
ENSMUSG00000078107	11	10	NA
ENSMUSG00000055657	11	10	unbiased
ENSMUSG00000075295	11	10	NA
ENSMUSG00000074854	11	10	NA
ENSMUSG00000074857	11	10	NA
ENSMUSG00000020213	11	10	male
ENSMUSG00000045048	11	10	NA
ENSMUSG00000049576	11	10	NA
ENSMUSG00000064208	11	10	NA
ENSMUSG00000071303	11	10	NA
ENSMUSG00000078434	11	10	NA
ENSMUSG00000063320	11	10	NA
ENSMUSG00000069712	11	10	NA
ENSMUSG00000055515	11	10	NA
ENSMUSG00000062918	11	10	NA
ENSMUSG00000074858	11	10	NA
ENSMUSG00000079938	11	10	NA
ENSMUSG00000079886	11	10	NA
ENSMUSG00000079929	11	10	NA
ENSMUSG00000056877	11	10	NA
ENSMUSG00000079928	11	10	NA
ENSMUSG00000063953	11	10	NA
ENSMUSG00000062279	11	10	NA
ENSMUSG00000062224	11	10	NA
ENSMUSG00000071151	11	10	NA
ENSMUSG00000048538	11	1	NA
ENSMUSG00000073602	11	1	NA
ENSMUSG00000052477	11	1	NA
ENSMUSG00000025986	11	1	female
ENSMUSG00000047528	11	1	male
ENSMUSG00000073490	11	1	NA
ENSMUSG00000073489	11	1	female
ENSMUSG00000080015	11	1	NA
ENSMUSG00000041722	11	1	NA
ENSMUSG00000060244	11	1	NA
ENSMUSG00000060125	11	1	NA
ENSMUSG00000059483	11	1	NA
ENSMUSG00000067125	11	1	NA
ENSMUSG00000061852	11	1	NA
ENSMUSG00000041144	11	1	NA
ENSMUSG00000073659	11	1	NA
ENSMUSG00000026401	11	1	male
ENSMUSG00000026063	11	1	male
ENSMUSG00000066677	11	1	NA
ENSMUSG00000057499	11	1	NA
ENSMUSG00000049830	11	1	NA
ENSMUSG00000059999	11	1	NA
ENSMUSG00000080021	11	1	NA
ENSMUSG00000073491	11	1	NA
ENSMUSG00000043263	11	1	male
ENSMUSG00000061187	11	1	NA
ENSMUSG00000067015	11	1	NA
ENSMUSG00000078288	11	1	NA
ENSMUSG00000070896	11	1	NA
ENSMUSG00000073694	11	1	NA
ENSMUSG00000078291	11	1	NA
ENSMUSG00000067716	11	1	NA
ENSMUSG00000079572	11	1	NA
ENSMUSG00000078295	11	1	NA
ENSMUSG00000079904	11	1	NA
ENSMUSG00000080017	11	1	NA
ENSMUSG00000079459	11	1	NA
ENSMUSG00000079458	11	1	NA
ENSMUSG00000072109	11	1	NA
ENSMUSG00000067736	11	1	NA
ENSMUSG00000079457	11	1	NA
ENSMUSG00000079456	11	1	NA
ENSMUSG00000079455	11	1	NA
ENSMUSG00000040323	11	1	NA
ENSMUSG00000079453	11	1	NA
ENSMUSG00000026531	11	1	unbiased
ENSMUSG00000079907	11	1	NA
ENSMUSG00000055676	11	1	NA
ENSMUSG00000080020	11	1	NA
ENSMUSG00000080262	11	1	NA
ENSMUSG00000079908	11	1	NA
ENSMUSG00000073559	11	1	NA
ENSMUSG00000061992	11	1	NA
ENSMUSG00000059147	11	1	NA
ENSMUSG00000067536	11	1	NA
ENSMUSG00000073552	11	1	NA
ENSMUSG00000072978	11	1	NA
ENSMUSG00000056307	11	1	NA
ENSMUSG00000063042	11	1	NA
ENSMUSG00000035522	10	X	male
ENSMUSG00000037381	10	X	NA
ENSMUSG00000079618	10	X	NA
ENSMUSG00000059663	10	X	NA
ENSMUSG00000078327	10	X	NA
ENSMUSG00000035651	10	X	male
ENSMUSG00000080288	10	X	NA
ENSMUSG00000000003	10	X	unbiased
ENSMUSG00000049815	10	X	NA
ENSMUSG00000044597	10	X	male
ENSMUSG00000048573	10	X	male
ENSMUSG00000079627	10	X	NA
ENSMUSG00000067561	10	X	NA
ENSMUSG00000078209	10	X	NA
ENSMUSG00000078210	10	X	NA
ENSMUSG00000067679	10	X	NA
ENSMUSG00000072479	10	X	NA
ENSMUSG00000045797	10	X	male
ENSMUSG00000067646	10	X	NA
ENSMUSG00000071769	10	X	NA
ENSMUSG00000071773	10	X	NA
ENSMUSG00000025051	10	X	male
ENSMUSG00000059334	10	X	NA
ENSMUSG00000080070	10	X	NA
ENSMUSG00000043661	10	X	NA
ENSMUSG00000078206	10	X	NA
ENSMUSG00000071738	10	X	NA
ENSMUSG00000079628	10	X	NA
ENSMUSG00000080024	10	X	NA
ENSMUSG00000025288	10	X	male
ENSMUSG00000068173	10	X	NA
ENSMUSG00000060685	10	X	NA
ENSMUSG00000068113	10	X	NA
ENSMUSG00000054727	10	X	male
ENSMUSG00000043569	10	X	male
ENSMUSG00000080037	10	X	NA
ENSMUSG00000055357	10	X	male
ENSMUSG00000053909	10	X	NA
ENSMUSG00000080044	10	X	NA
ENSMUSG00000023257	10	X	male
ENSMUSG00000080068	10	X	NA
ENSMUSG00000062226	10	X	NA
ENSMUSG00000057836	10	X	NA
ENSMUSG00000052025	10	X	male
ENSMUSG00000051038	10	X	NA
ENSMUSG00000072931	10	X	NA
ENSMUSG00000050470	10	X	NA
ENSMUSG00000048040	10	X	female
ENSMUSG00000058986	10	X	NA
ENSMUSG00000073085	10	X	NA
ENSMUSG00000031118	10	X	male
ENSMUSG00000079536	10	X	NA
ENSMUSG00000031194	10	X	male
ENSMUSG00000031125	10	X	NA
ENSMUSG00000035387	10	X	NA
ENSMUSG00000056815	10	X	NA
ENSMUSG00000031179	10	X	male
ENSMUSG00000079352	10	X	NA
ENSMUSG00000073210	10	X	NA
ENSMUSG00000073006	10	X	male
ENSMUSG00000079432	10	X	NA
ENSMUSG00000079464	10	X	NA
ENSMUSG00000079525	10	X	male
ENSMUSG00000031181	10	X	male
ENSMUSG00000058670	10	X	NA
ENSMUSG00000048355	10	X	female
ENSMUSG00000051257	10	X	male
ENSMUSG00000032894	10	X	NA
ENSMUSG00000064137	10	X	NA
ENSMUSG00000052625	10	9	NA
ENSMUSG00000052658	10	9	male
ENSMUSG00000070309	10	9	NA
ENSMUSG00000066463	10	9	female
ENSMUSG00000049229	10	9	NA
ENSMUSG00000059303	10	9	NA
ENSMUSG00000045528	10	9	NA
ENSMUSG00000074029	10	9	NA
ENSMUSG00000058692	10	9	NA
ENSMUSG00000079530	10	9	NA
ENSMUSG00000043087	10	9	NA
ENSMUSG00000074448	10	9	NA
ENSMUSG00000062121	10	9	NA
ENSMUSG00000066443	10	9	NA
ENSMUSG00000079245	10	9	NA
ENSMUSG00000047995	10	9	NA
ENSMUSG00000064173	10	9	NA
ENSMUSG00000044860	10	9	unbiased
ENSMUSG00000057029	10	9	NA
ENSMUSG00000074263	10	9	NA
ENSMUSG00000058659	10	9	NA
ENSMUSG00000058515	10	9	NA
ENSMUSG00000074239	10	9	NA
ENSMUSG00000050702	10	9	NA
ENSMUSG00000043773	10	9	male
ENSMUSG00000060101	10	9	NA
ENSMUSG00000070311	10	9	NA
ENSMUSG00000070313	10	9	male
ENSMUSG00000051562	10	9	NA
ENSMUSG00000066897	10	9	NA
ENSMUSG00000079556	10	9	NA
ENSMUSG00000057444	10	9	NA
ENSMUSG00000031802	10	9	NA
ENSMUSG00000064039	10	9	unbiased
ENSMUSG00000070312	10	9	NA
ENSMUSG00000074409	10	9	NA
ENSMUSG00000049742	10	9	NA
ENSMUSG00000055051	10	9	NA
ENSMUSG00000079231	10	9	NA
ENSMUSG00000057933	10	9	male
ENSMUSG00000031998	10	9	male
ENSMUSG00000070282	10	9	female
ENSMUSG00000078306	10	9	NA
ENSMUSG00000074039	10	9	male
ENSMUSG00000066903	10	9	NA
ENSMUSG00000062841	10	9	NA
ENSMUSG00000059731	10	9	NA
ENSMUSG00000049864	10	9	NA
ENSMUSG00000079486	10	9	NA
ENSMUSG00000045204	10	9	NA
ENSMUSG00000062868	10	9	NA
ENSMUSG00000062388	10	9	NA
ENSMUSG00000059942	10	9	NA
ENSMUSG00000065958	10	8	NA
ENSMUSG00000079113	10	8	NA
ENSMUSG00000039785	10	8	male
ENSMUSG00000074294	10	8	NA
ENSMUSG00000079045	10	8	NA
ENSMUSG00000071169	10	8	NA
ENSMUSG00000071165	10	8	NA
ENSMUSG00000080221	10	8	NA
ENSMUSG00000023737	10	8	male
ENSMUSG00000063900	10	8	NA
ENSMUSG00000049476	10	8	male
ENSMUSG00000046881	10	8	NA
ENSMUSG00000040197	10	8	unbiased
ENSMUSG00000074436	10	8	NA
ENSMUSG00000065952	10	8	NA
ENSMUSG00000051906	10	8	unbiased
ENSMUSG00000074252	10	8	NA
ENSMUSG00000060427	10	8	unbiased
ENSMUSG00000080063	10	8	NA
ENSMUSG00000044743	10	8	male
ENSMUSG00000074215	10	8	NA
ENSMUSG00000044794	10	8	NA
ENSMUSG00000079120	10	8	NA
ENSMUSG00000058568	10	8	NA
ENSMUSG00000053678	10	8	NA
ENSMUSG00000031495	10	8	unbiased
ENSMUSG00000079114	10	8	NA
ENSMUSG00000053790	10	8	NA
ENSMUSG00000053695	10	8	NA
ENSMUSG00000069962	10	8	NA
ENSMUSG00000059230	10	8	unbiased
ENSMUSG00000040165	10	8	unbiased
ENSMUSG00000061847	10	8	NA
ENSMUSG00000065987	10	8	unbiased
ENSMUSG00000070847	10	7	NA
ENSMUSG00000078795	10	7	unbiased
ENSMUSG00000059227	10	7	NA
ENSMUSG00000062434	10	7	NA
ENSMUSG00000041775	10	7	unbiased
ENSMUSG00000070778	10	7	NA
ENSMUSG00000050870	10	7	NA
ENSMUSG00000073908	10	7	NA
ENSMUSG00000066125	10	7	NA
ENSMUSG00000073900	10	7	NA
ENSMUSG00000058661	10	7	NA
ENSMUSG00000059206	10	7	NA
ENSMUSG00000070546	10	7	NA
ENSMUSG00000078814	10	7	NA
ENSMUSG00000073893	10	7	NA
ENSMUSG00000066123	10	7	NA
ENSMUSG00000058717	10	7	NA
ENSMUSG00000070824	10	7	NA
ENSMUSG00000074366	10	7	female
ENSMUSG00000066122	10	7	NA
ENSMUSG00000066101	10	7	NA
ENSMUSG00000073793	10	7	NA
ENSMUSG00000073786	10	7	NA
ENSMUSG00000070458	10	7	NA
ENSMUSG00000073781	10	7	NA
ENSMUSG00000074377	10	7	NA
ENSMUSG00000063047	10	7	NA
ENSMUSG00000060565	10	7	NA
ENSMUSG00000063133	10	7	male
ENSMUSG00000074394	10	7	NA
ENSMUSG00000060549	10	7	NA
ENSMUSG00000063254	10	7	unbiased
ENSMUSG00000070799	10	7	NA
ENSMUSG00000073892	10	7	NA
ENSMUSG00000070845	10	7	NA
ENSMUSG00000063437	10	7	NA
ENSMUSG00000060314	10	7	unbiased
ENSMUSG00000063394	10	7	NA
ENSMUSG00000058679	10	7	NA
ENSMUSG00000051051	10	7	NA
ENSMUSG00000074365	10	7	unbiased
ENSMUSG00000070526	10	7	NA
ENSMUSG00000070797	10	7	NA
ENSMUSG00000034122	10	7	NA
ENSMUSG00000059136	10	7	NA
ENSMUSG00000066124	10	7	NA
ENSMUSG00000070798	10	7	NA
ENSMUSG00000059108	10	7	female
ENSMUSG00000058510	10	7	NA
ENSMUSG00000043308	10	7	NA
ENSMUSG00000078788	10	7	NA
ENSMUSG00000047545	10	7	NA
ENSMUSG00000004542	10	7	unbiased
ENSMUSG00000063713	10	7	male
ENSMUSG00000074164	10	7	NA
ENSMUSG00000078616	10	7	NA
ENSMUSG00000008789	10	7	NA
ENSMUSG00000080144	10	7	NA
ENSMUSG00000059042	10	7	NA
ENSMUSG00000078087	10	7	NA
ENSMUSG00000080176	10	7	NA
ENSMUSG00000056883	10	7	NA
ENSMUSG00000030469	10	7	female
ENSMUSG00000078711	10	7	NA
ENSMUSG00000053720	10	7	NA
ENSMUSG00000007209	10	7	unbiased
ENSMUSG00000053719	10	7	male
ENSMUSG00000056885	10	7	NA
ENSMUSG00000070574	10	7	male
ENSMUSG00000055826	10	7	male
ENSMUSG00000060059	10	7	NA
ENSMUSG00000058621	10	7	NA
ENSMUSG00000078628	10	7	NA
ENSMUSG00000053228	10	7	NA
ENSMUSG00000045813	10	7	NA
ENSMUSG00000057997	10	7	NA
ENSMUSG00000066760	10	7	unbiased
ENSMUSG00000066820	10	7	NA
ENSMUSG00000066513	10	7	male
ENSMUSG00000066804	10	7	NA
ENSMUSG00000066805	10	7	NA
ENSMUSG00000040601	10	7	female
ENSMUSG00000074107	10	7	NA
ENSMUSG00000078118	10	7	NA
ENSMUSG00000066843	10	7	NA
ENSMUSG00000020168	10	7	NA
ENSMUSG00000057832	10	7	NA
ENSMUSG00000074143	10	7	NA
ENSMUSG00000046716	10	7	NA
ENSMUSG00000080155	10	7	NA
ENSMUSG00000066850	10	7	unbiased
ENSMUSG00000030368	10	7	unbiased
ENSMUSG00000078646	10	7	NA
ENSMUSG00000061782	10	7	NA
ENSMUSG00000054381	10	7	NA
ENSMUSG00000078752	10	7	NA
ENSMUSG00000069390	10	7	NA
ENSMUSG00000062147	10	7	NA
ENSMUSG00000074297	10	7	NA
ENSMUSG00000023159	10	7	NA
ENSMUSG00000079868	10	7	NA
ENSMUSG00000062116	10	7	female
ENSMUSG00000062073	10	7	NA
ENSMUSG00000062042	10	7	NA
ENSMUSG00000055621	10	7	NA
ENSMUSG00000078753	10	7	NA
ENSMUSG00000051680	10	7	NA
ENSMUSG00000078779	10	7	NA
ENSMUSG00000060177	10	7	NA
ENSMUSG00000066240	10	7	NA
ENSMUSG00000055571	10	7	NA
ENSMUSG00000073945	10	7	NA
ENSMUSG00000078776	10	7	NA
ENSMUSG00000066241	10	7	NA
ENSMUSG00000043599	10	7	NA
ENSMUSG00000054272	10	7	NA
ENSMUSG00000045868	10	7	NA
ENSMUSG00000049579	10	7	NA
ENSMUSG00000060974	10	7	NA
ENSMUSG00000061000	10	7	NA
ENSMUSG00000046130	10	7	NA
ENSMUSG00000066537	10	7	NA
ENSMUSG00000046248	10	7	NA
ENSMUSG00000073944	10	7	NA
ENSMUSG00000080091	10	7	NA
ENSMUSG00000080094	10	7	NA
ENSMUSG00000045928	10	7	male
ENSMUSG00000066515	10	7	male
ENSMUSG00000049062	10	7	NA
ENSMUSG00000078737	10	7	NA
ENSMUSG00000056926	10	6	NA
ENSMUSG00000059410	10	6	NA
ENSMUSG00000058595	10	6	unbiased
ENSMUSG00000060390	10	6	NA
ENSMUSG00000056901	10	6	NA
ENSMUSG00000058295	10	6	NA
ENSMUSG00000058349	10	6	NA
ENSMUSG00000071204	10	6	NA
ENSMUSG00000058108	10	6	unbiased
ENSMUSG00000058588	10	6	NA
ENSMUSG00000068536	10	6	NA
ENSMUSG00000059546	10	6	male
ENSMUSG00000056771	10	6	male
ENSMUSG00000060151	10	6	unbiased
ENSMUSG00000058923	10	6	NA
ENSMUSG00000068476	10	6	NA
ENSMUSG00000059659	10	6	NA
ENSMUSG00000044248	10	6	unbiased
ENSMUSG00000023289	10	6	male
ENSMUSG00000059362	10	6	NA
ENSMUSG00000058825	10	6	NA
ENSMUSG00000039215	10	6	NA
ENSMUSG00000059639	10	6	NA
ENSMUSG00000058119	10	6	NA
ENSMUSG00000058731	10	6	unbiased
ENSMUSG00000062818	10	6	male
ENSMUSG00000072950	10	6	NA
ENSMUSG00000062528	10	6	NA
ENSMUSG00000071893	10	6	NA
ENSMUSG00000079299	10	6	NA
ENSMUSG00000079295	10	6	NA
ENSMUSG00000049249	10	6	NA
ENSMUSG00000079282	10	6	NA
ENSMUSG00000030157	10	6	female
ENSMUSG00000079495	10	6	NA
ENSMUSG00000030178	10	6	NA
ENSMUSG00000060724	10	6	male
ENSMUSG00000079940	10	6	NA
ENSMUSG00000079281	10	6	NA
ENSMUSG00000079280	10	6	NA
ENSMUSG00000046764	10	6	unbiased
ENSMUSG00000072697	10	6	NA
ENSMUSG00000062833	10	6	NA
ENSMUSG00000062905	10	6	NA
ENSMUSG00000061208	10	6	NA
ENSMUSG00000029813	10	6	unbiased
ENSMUSG00000067591	10	6	NA
ENSMUSG00000068426	10	6	NA
ENSMUSG00000079853	10	6	unbiased
ENSMUSG00000029865	10	6	unbiased
ENSMUSG00000048697	10	6	NA
ENSMUSG00000030004	10	6	male
ENSMUSG00000063171	10	6	male
ENSMUSG00000030131	10	6	NA
ENSMUSG00000036938	10	6	NA
ENSMUSG00000030148	10	6	unbiased
ENSMUSG00000079279	10	6	NA
ENSMUSG00000071519	10	6	unbiased
ENSMUSG00000030361	10	6	unbiased
ENSMUSG00000072778	10	6	NA
ENSMUSG00000063762	10	6	NA
ENSMUSG00000079264	10	6	NA
ENSMUSG00000068232	10	6	unbiased
ENSMUSG00000079263	10	6	NA
ENSMUSG00000068234	10	6	NA
ENSMUSG00000072878	10	6	male
ENSMUSG00000079262	10	6	male
ENSMUSG00000030365	10	6	unbiased
ENSMUSG00000072780	10	6	NA
ENSMUSG00000079544	10	6	NA
ENSMUSG00000068231	10	6	unbiased
ENSMUSG00000071517	10	6	NA
ENSMUSG00000060687	10	6	unbiased
ENSMUSG00000072917	10	6	unbiased
ENSMUSG00000079276	10	6	NA
ENSMUSG00000079275	10	6	NA
ENSMUSG00000079960	10	6	NA
ENSMUSG00000072717	10	6	NA
ENSMUSG00000061653	10	6	male
ENSMUSG00000056035	10	5	unbiased
ENSMUSG00000079643	10	5	NA
ENSMUSG00000059244	10	5	NA
ENSMUSG00000075551	10	5	NA
ENSMUSG00000072817	10	5	NA
ENSMUSG00000061292	10	5	NA
ENSMUSG00000067356	10	5	NA
ENSMUSG00000074011	10	5	NA
ENSMUSG00000033467	10	5	male
ENSMUSG00000053873	10	5	male
ENSMUSG00000073116	10	5	NA
ENSMUSG00000073117	10	5	NA
ENSMUSG00000072823	10	5	NA
ENSMUSG00000073119	10	5	NA
ENSMUSG00000066684	10	5	unbiased
ENSMUSG00000072824	10	5	NA
ENSMUSG00000072820	10	5	NA
ENSMUSG00000079416	10	5	NA
ENSMUSG00000072639	10	5	NA
ENSMUSG00000070933	10	5	NA
ENSMUSG00000066867	10	5	female
ENSMUSG00000066861	10	5	NA
ENSMUSG00000072722	10	5	NA
ENSMUSG00000070940	10	5	NA
ENSMUSG00000059645	10	5	NA
ENSMUSG00000001168	10	5	female
ENSMUSG00000051940	10	5	NA
ENSMUSG00000074007	10	5	NA
ENSMUSG00000075599	10	5	NA
ENSMUSG00000075575	10	5	NA
ENSMUSG00000079424	10	5	NA
ENSMUSG00000056014	10	5	female
ENSMUSG00000013989	10	5	unbiased
ENSMUSG00000046548	10	5	NA
ENSMUSG00000047652	10	5	NA
ENSMUSG00000067010	10	5	unbiased
ENSMUSG00000075598	10	5	NA
ENSMUSG00000074009	10	5	NA
ENSMUSG00000078186	10	5	NA
ENSMUSG00000029605	10	5	unbiased
ENSMUSG00000029564	10	5	male
ENSMUSG00000068017	10	5	NA
ENSMUSG00000008843	10	5	male
ENSMUSG00000038165	10	5	male
ENSMUSG00000040429	10	5	unbiased
ENSMUSG00000051503	10	5	NA
ENSMUSG00000070686	10	5	NA
ENSMUSG00000080251	10	5	NA
ENSMUSG00000073498	10	5	NA
ENSMUSG00000079163	10	5	unbiased
ENSMUSG00000054417	10	5	female
ENSMUSG00000073500	10	5	NA
ENSMUSG00000060835	10	5	NA
ENSMUSG00000067626	10	5	NA
ENSMUSG00000079995	10	5	NA
ENSMUSG00000067848	10	5	NA
ENSMUSG00000067700	10	5	NA
ENSMUSG00000032623	10	5	NA
ENSMUSG00000029409	10	5	male
ENSMUSG00000080250	10	5	NA
ENSMUSG00000067698	10	5	NA
ENSMUSG00000039563	10	5	unbiased
ENSMUSG00000067582	10	5	NA
ENSMUSG00000079156	10	5	NA
ENSMUSG00000065999	10	4	NA
ENSMUSG00000066000	10	4	unbiased
ENSMUSG00000029451	10	4	unbiased
ENSMUSG00000066030	10	4	NA
ENSMUSG00000050810	10	4	female
ENSMUSG00000078683	10	4	NA
ENSMUSG00000037028	10	4	NA
ENSMUSG00000054514	10	4	NA
ENSMUSG00000052098	10	4	NA
ENSMUSG00000058186	10	4	NA
ENSMUSG00000078688	10	4	NA
ENSMUSG00000078687	10	4	NA
ENSMUSG00000078686	10	4	NA
ENSMUSG00000078675	10	4	NA
ENSMUSG00000035201	10	4	NA
ENSMUSG00000058523	10	4	unbiased
ENSMUSG00000078680	10	4	NA
ENSMUSG00000028287	10	4	male
ENSMUSG00000078672	10	4	NA
ENSMUSG00000054885	10	4	NA
ENSMUSG00000078497	10	4	NA
ENSMUSG00000078673	10	4	NA
ENSMUSG00000049972	10	4	NA
ENSMUSG00000046133	10	4	unbiased
ENSMUSG00000073760	10	4	NA
ENSMUSG00000073761	10	4	NA
ENSMUSG00000078503	10	4	NA
ENSMUSG00000078495	10	4	NA
ENSMUSG00000066154	10	4	unbiased
ENSMUSG00000066153	10	4	NA
ENSMUSG00000073765	10	4	male
ENSMUSG00000062518	10	4	NA
ENSMUSG00000078511	10	4	NA
ENSMUSG00000073770	10	4	NA
ENSMUSG00000078519	10	4	unbiased
ENSMUSG00000073842	10	4	NA
ENSMUSG00000073834	10	4	NA
ENSMUSG00000028593	10	4	NA
ENSMUSG00000066063	10	4	NA
ENSMUSG00000066097	10	4	unbiased
ENSMUSG00000066071	10	4	unbiased
ENSMUSG00000073682	10	4	NA
ENSMUSG00000070868	10	4	NA
ENSMUSG00000078631	10	4	NA
ENSMUSG00000061075	10	4	NA
ENSMUSG00000079923	10	4	NA
ENSMUSG00000078626	10	4	NA
ENSMUSG00000078625	10	4	NA
ENSMUSG00000070890	10	4	NA
ENSMUSG00000056300	10	4	NA
ENSMUSG00000078623	10	4	NA
ENSMUSG00000073673	10	4	NA
ENSMUSG00000078750	10	3	NA
ENSMUSG00000066035	10	3	NA
ENSMUSG00000042212	10	3	unbiased
ENSMUSG00000078751	10	3	NA
ENSMUSG00000042157	10	3	unbiased
ENSMUSG00000027902	10	3	NA
ENSMUSG00000027919	10	3	NA
ENSMUSG00000068877	10	3	NA
ENSMUSG00000062778	10	3	unbiased
ENSMUSG00000078781	10	3	NA
ENSMUSG00000028177	10	3	unbiased
ENSMUSG00000064290	10	3	NA
ENSMUSG00000042124	10	3	unbiased
ENSMUSG00000063779	10	3	male
ENSMUSG00000069125	10	3	NA
ENSMUSG00000058005	10	3	NA
ENSMUSG00000074399	10	3	NA
ENSMUSG00000055030	10	3	NA
ENSMUSG00000069118	10	3	male
ENSMUSG00000074429	10	3	NA
ENSMUSG00000059676	10	3	NA
ENSMUSG00000068888	10	3	unbiased
ENSMUSG00000043897	10	3	NA
ENSMUSG00000080011	10	3	NA
ENSMUSG00000080003	10	3	NA
ENSMUSG00000074427	10	3	NA
ENSMUSG00000080002	10	3	NA
ENSMUSG00000074619	10	3	NA
ENSMUSG00000078592	10	3	NA
ENSMUSG00000078604	10	3	NA
ENSMUSG00000068924	10	3	NA
ENSMUSG00000068879	10	3	NA
ENSMUSG00000074424	10	3	NA
ENSMUSG00000074428	10	3	NA
ENSMUSG00000074426	10	3	NA
ENSMUSG00000080012	10	3	NA
ENSMUSG00000074581	10	3	NA
ENSMUSG00000054215	10	3	male
ENSMUSG00000079949	10	3	NA
ENSMUSG00000054773	10	3	NA
ENSMUSG00000044138	10	3	NA
ENSMUSG00000074598	10	3	NA
ENSMUSG00000079950	10	3	NA
ENSMUSG00000079952	10	3	NA
ENSMUSG00000078655	10	3	NA
ENSMUSG00000080168	10	3	NA
ENSMUSG00000075107	10	2	NA
ENSMUSG00000049086	10	2	female
ENSMUSG00000075106	10	2	NA
ENSMUSG00000075110	10	2	NA
ENSMUSG00000075104	10	2	NA
ENSMUSG00000075108	10	2	NA
ENSMUSG00000075111	10	2	NA
ENSMUSG00000075105	10	2	NA
ENSMUSG00000075097	10	2	NA
ENSMUSG00000079863	10	2	NA
ENSMUSG00000016998	10	2	male
ENSMUSG00000017000	10	2	unbiased
ENSMUSG00000017004	10	2	male
ENSMUSG00000074555	10	2	NA
ENSMUSG00000068645	10	2	NA
ENSMUSG00000068644	10	2	NA
ENSMUSG00000063507	10	2	NA
ENSMUSG00000079027	10	2	NA
ENSMUSG00000069875	10	2	NA
[truncated: 19,124 more rows]
