# Supplementary material for: Chromosomal Redistribution of Male-Biased Genes in Mammalian Evolution with Two Bursts of Gene Gain on the X Chromosome
Source: PLoS Biol. 2010 Oct 5;8(10):e1000494. doi: 10.1371/journal.pbio.1000494 (PMC2950125; doi:10.1371/journal.pbio.1000494)
Supplement: Table S5 — Estimation of nucleotide substitution driven by positive selection using DoEF package [31] . a Since these re-sequencing data cover so few primate-specific genes (branch≥8), we categorized all eutherian-specific genes (branch≥5) as young genes and the remaining ones as old genes. In other words, all genes originating after the emergence of the X chromosome are defined as “young” genes here. b LikeLihood Ratio (LLR) test shows whether the estimated α is significantly different compared to the neutral estimation, i.e., α of 0. “ns” indicates “not significant” or p≥0.05. c DoEF did not reach convergence when the sample size is too large. So we randomly sampled 300 genes from all old autosome-linked genes. (0.02 MB DOC) [file pbio.1000494.s013.xls]

## Sheet: S5
Table S5. Estimation of nucleotide substitution driven by positive selection using DoEF package
Brancha	Chromosome	Bias	α	Gene Number	LLRb
Young	X	Male	0.501	13	ns
		Female	-0.647	17	ns
		Unbiased	-0.081	15	ns
		Male	-0.083	93	ns
	Autosome	Female	-0.18	99	ns
		Unbiased	-0.245	220	ns
Old	X	Male	0.04	33	ns
		Female	-0.914	142	p<0.01
		Unbiased	-0.46	124	ns
	Autosome	Male	-0.575	300c	p<0.0001
		Female	-0.776	300	p<0.0001
		Unbiased	-0.951	300	p<0.0001
