# Supplementary material for: Chromosomal Redistribution of Male-Biased Genes in Mammalian Evolution with Two Bursts of Gene Gain on the X Chromosome
Source: PLoS Biol. 2010 Oct 5;8(10):e1000494. doi: 10.1371/journal.pbio.1000494 (PMC2950125; doi:10.1371/journal.pbio.1000494)
Supplement: Table S9 — Expression bias of parental genes and retrogenes. Since Affymetrix 3′ array does not provide unique probes for many young retrogenes, we used Affymetrix exon array to call sex bias in this table. Cells with female-biased parental gene and male-biased retrogene are marked in red. (0.02 MB XLS) [file pbio.1000494.s017.xls]

## Sheet: S9
Table S9. Expression bias of parental gene and retrogene
Human
X->A				A->A & A->X
Parent	Child			Parent		Child
\	Male	Female	Unbiased	\	Male	Female	Unbiased
Male	1	0	2	Male	18	3	14
Female	5	4	7	Female	2	16	31
Unbiased	8	1	4	Unbiased	21	7	58
5 out of 32 compared to 2 out of 170, Fisher's Exact Test p=0.001
Mouse
X->A				A->A & A->X
Parent	Child			Parent		Child
\	Male	Female	Unbiased	\	Male	Female	Unbiased
Male	7	0	0	Male	43	7	18
Female	12	5	7	Female	24	108	72
Unbiased	1	0	0	Unbiased	9	9	16
12 out of 32 compared to 24 out of 306, Chi-square test p=2x10-5
