# Supplementary material for: Chromosomal Redistribution of Male-Biased Genes in Mammalian Evolution with Two Bursts of Gene Gain on the X Chromosome
Source: PLoS Biol. 2010 Oct 5;8(10):e1000494. doi: 10.1371/journal.pbio.1000494 (PMC2950125; doi:10.1371/journal.pbio.1000494)
Supplement: Table S11 — Annotation of genes encoded by pseudoautosomal regions (PARs). “Ensembl Branch” shows the age information inferred from the Ensembl homolog tree [54]. In cases where the tree includes some ambiguous nodes, i.e., Ensembl could not differentiate between speciation events and duplication events, we show “NA” there. Notably, Ensembl annotated 30 entries in PARs, 10 of which are pseudogenes. For the remaining 20 genes, we dated 17 entries. (0.02 MB XLS) [file pbio.1000494.s019.xls]

## Sheet: S11
Table S11. Annotation of genes encoded by pseudoautosomal regions (PARs).
Gene	Bias	Coordinate	Branch	Ensembl branch	PAR	Symbol	Description
ENSG00000182378	unbiased	0.1465	9	12	PAR1	PLCXD1	phosphatidylinositol-specific phospholipase C, X domain containing 1
ENSG00000178605	female	0.1655	9	NA	PAR1	GTPBP6	GTP binding protein 6 (putative)
ENSG00000167393	male	0.2413	7	0	PAR1	PPP2R3B	protein phosphatase 2 (formerly 2A), regulatory subunit B'', beta
ENSG00000185960	NA	0.5226	0	NA	PAR1	SHOX	short stature homeobox
ENSG00000205755	NA	1.2832	10	2	PAR1	CRLF2	cytokine receptor-like factor 2
ENSG00000198223	unbiased	1.3683	5	5	PAR1	CSF2RA	colony stimulating factor 2 receptor, alpha, low-affinity (granulocyte-macrophage)
ENSG00000169100	female	1.4681	2	5	PAR1	SLC25A6	solute carrier family 25 (mitochondrial carrier; adenine nucleotide translocator), member 6
ENSG00000169093	female	1.5069	0	NA	PAR1	ASMTL	acetylserotonin O-methyltransferase-like
ENSG00000182162	unbiased	1.5787	8	NA	PAR1	P2RY8	purinergic receptor P2Y, G-protein coupled, 8
ENSG00000197976	female	1.6759	10	10	PAR1	SFRS17A	splicing factor, arginine/serine-rich 17A
ENSG00000196433	unbiased	1.708	10	0	PAR1	ASMT	acetylserotonin O-methyltransferase
ENSG00000205681	NA	2.24	10	9	PAR1	NA	NA
ENSG00000169084	unbiased	2.29	0	0	PAR1	DHRSX	dehydrogenase/reductase (SDR family) X-linked
ENSG00000214717	female	2.42	1	NA	PAR1	ZBED1	zinc finger, BED-type containing 1
ENSG00000168939	female	154.658	0	0	PAR2	SPRY3	sprouty homolog 3 (Drosophila)
ENSG00000124334	NA	154.887	9	9	PAR2	IL9R	interleukin 9 receptor
ENSG00000182484	NA	154.906	12	12	PAR2	LOC376475	CXYorf1-related protein
